# Supplementary material for: Copper (II) Ions Induced Self-Disproportionation of Enantiomers in Capillary Electrophoresis for the Quantification of Atenolol Enantiomers
Source: MDPI journal article supplement (doi:10.3390/molecules28155908), 2023-08-06
Supplement: s1 [file s1]

## Electronic Supplementary Material

# Copper (II) Ions Induced Self-Disproportionation of Enantiomers in Capillary Electrophoresis for the Quantification of Atenolol Enantiomers

Shaoqiang Hu

Henan Key Laboratory of Function-Oriented Porous Materials, College of Chemistry and Chemical Engineering, Luoyang Normal University, Luoyang 471934, China; shaoqianghu@lynu.edu.cn

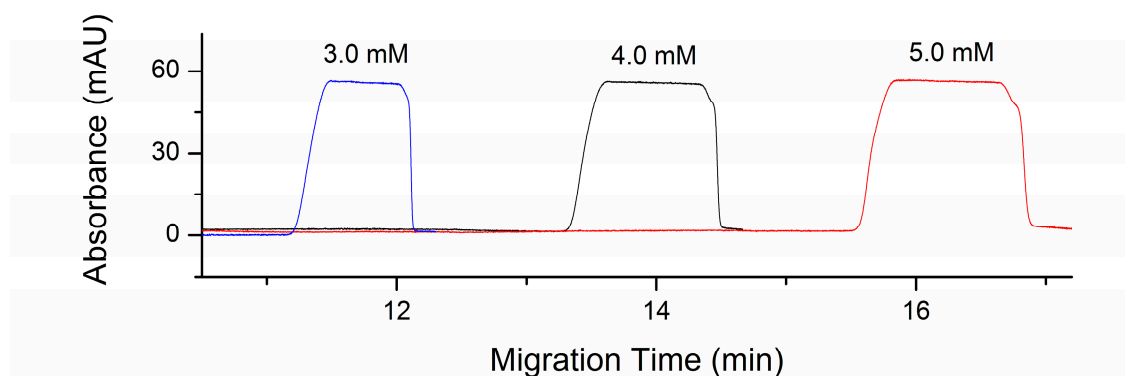

**Figure S1.** Effect of  $\text{Cu}(\text{NH}_3)_4^{2+}$  concentration on the step shape. BGE component besides  $\text{Cu}(\text{NH}_3)_4^{2+}$ : 0.2 M  $\text{NH}_4\text{OH}$ , pH 11.0. Sample solution: mixtures of *S*- and *R*-atenolol in BGE with a total concentration of  $0.4 \text{ mg}\cdot\text{mL}^{-1}$  and *R*-atenolol content of 10.0% (m/m). Capillary: id 50  $\mu\text{m}$ , od 350  $\mu\text{m}$ , length 60.0 cm, 51.5 cm to detector. Capillary temperature: 20  $^\circ\text{C}$ . Hydrodynamic injection at 50 mBar for 60 s. Separation voltage: 30 kV. Detection wavelength: 230 nm.

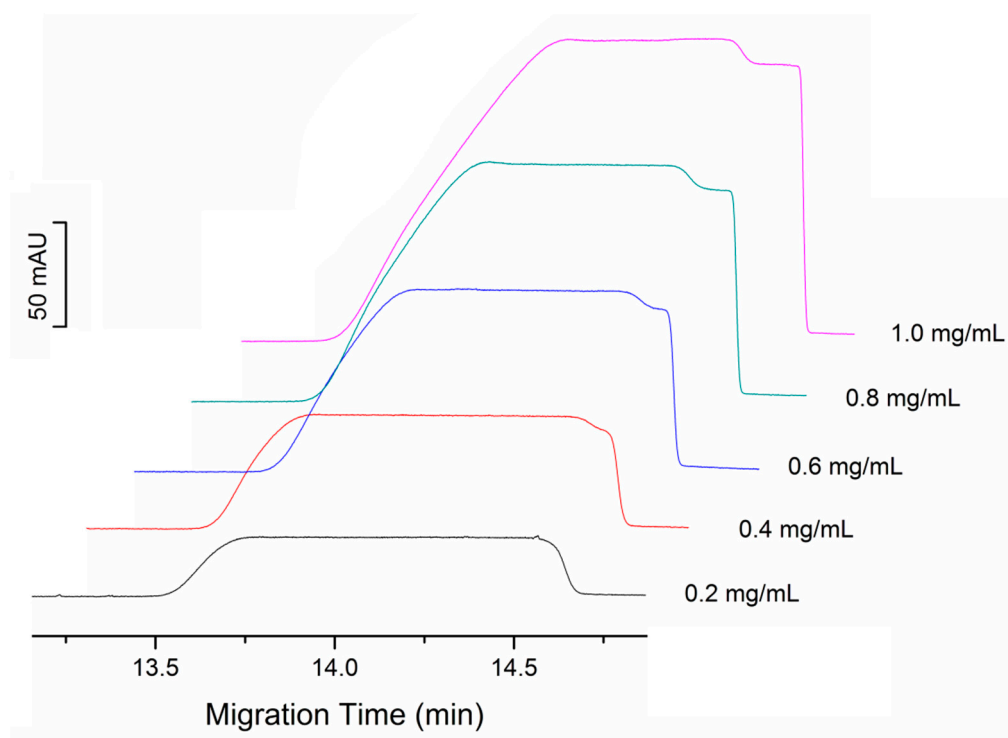

**Figure S2.** Effect of drug concentration (total concentration of two enantiomers) on the step shape. Sample solutions: mixtures of *S*- and *R*-atenolol in BGE with different total concentrations but a fixed *R*-atenolol content of 10.0% (m/m). BGE: 4.0 mM  $\text{Cu}(\text{NH}_3)_4^{2+}$  in 0.2 M  $\text{NH}_4\text{OH}$ , pH 11.0. CE conditions are the same as in Figure S1.

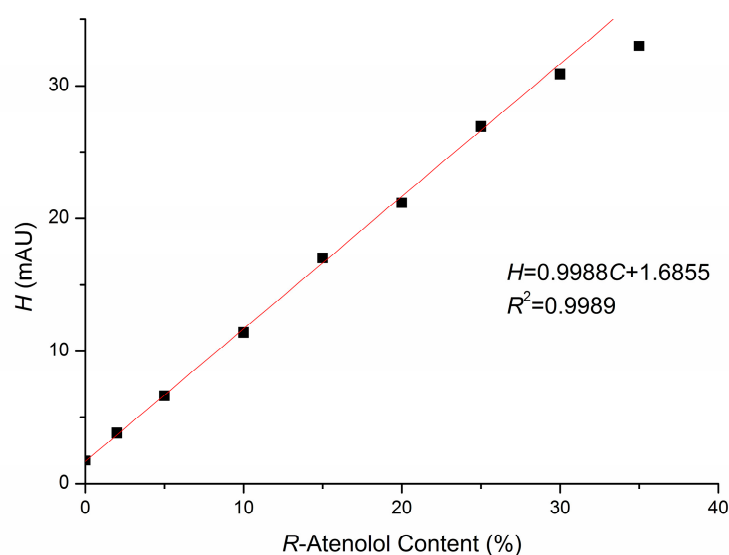

**Figure S3.** Linear relationship between the step height on CE curve and *R*-atenolol content. Sample solutions: mixtures of *S*- and *R*-atenolol in BGE with a fixed total concentration of 1.0 mg·mL<sup>-1</sup> but different *R*-atenolol contents (m/m). BGE and CE conditions are the same as in Figure 2.
